# Supplementary material for: Nano-graphite functionalized mesocellular carbon foam with enhanced intra-penetrating electrical percolation networks for high performance electrochemical energy storage electrode materials
Source: Royal Society of Chemistry journal article supplement (doi:10.1039/c2cp40657h), 2012-01-01
Supplement: c2cp40657h.pdf [file c2cp40657h.pdf]

## Supporting Information

# **Nano-graphite Functionalized Mesocellular Carbon Foam with Enhanced Intra-penetrating Electrical Percolation Networks for High Performance Electrochemical Energy Storage Electrode Materials**

**Changshin Jo,<sup>‡a</sup> Sunhyung An,<sup>‡a</sup> Younghoon Kim,<sup>b</sup> Jongmin Shim,<sup>a</sup> Songhun Yoon,<sup>\*b</sup> and Jinwoo Lee<sup>\*a</sup>**

<sup>a</sup>Department of Chemical Engineering, Pohang University of Science and Technology, Hyo-ja dong, Pohang, Kyungbuk, 790-784, KOREA. <sup>b</sup>Green Chemical Technology Division, Korea Research Institute of Chemical Technology (KRICT), Daejeon, 305-600, KOREA, <sup>‡</sup> Both authors contributed equally to this work

E-mail address: [jinwoo03@postech.ac.kr](mailto:jinwoo03@postech.ac.kr), [yoonsun@kRICT.re.kr](mailto:yoonsun@kRICT.re.kr)

**Table S1.** EDLC performance of various mesoporous carbon materials.

| Type of carbons                                                     | Surface area/<br>$\text{m}^2 \text{g}^{-1}$ | Capacitance /<br>$\text{F g}^{-1}$ | Electrolyte                    | Reference                                                         |
|---------------------------------------------------------------------|---------------------------------------------|------------------------------------|--------------------------------|-------------------------------------------------------------------|
| SOMC<br>(Short pore length ordered<br>mesoporous carbon)            | 1179<br>(3.9 nm pores)                      | 127 (at 5 mV<br>$\text{s}^{-1}$ )  | 6 M<br>KOH                     | H.-Q. Li et al. <i>J. Electrochem. Soc.</i> ,<br>154, A731 (2007) |
| LOMC<br>(Long pore length ordered<br>mesoporous carbon)             | 1362<br>(3.8 nm pores)                      | 113 (at 5 mV<br>$\text{s}^{-1}$ )  | 6 M<br>KOH                     | H.-Q. Li et al. <i>J. Electrochem. Soc.</i> ,<br>154, A731 (2007) |
| CMK-3<br>(Mesoporous carbon, 2-<br>dimensional hexagonal structure) | 984<br>(4 nm pores)                         | 115 (at 2 mV<br>$\text{s}^{-1}$ )  | 6 M<br>KOH                     | K. Xia et al. <i>Carbon</i> ,<br>46, 1718 (2008)                  |
| MSU-F-C<br>(Mesocellular carbon)                                    | 928<br>(4 & 28nm pores)                     | 109 (at 4 mV<br>$\text{s}^{-1}$ )  | 2 M<br>$\text{H}_2\text{SO}_4$ | This work                                                         |
| MSU-F-C-G<br>(Graphite functionalized<br>mesocellular carbon)       | 394<br>(28 nm pores)                        | 93 (at 4 mV $\text{s}^{-1}$ )      | 2 M<br>$\text{H}_2\text{SO}_4$ | This work                                                         |

**Table S2.** Lithium ion battery anode performance of mesoporous carbon materials.

| Type of carbons                                                          | Surface area/<br>$\text{m}^2 \text{g}^{-1}$ | Reversible<br>capacity /<br>$\text{mAh g}^{-1}$         | $\Delta V$ | Initial coulombic<br>efficiency / %<br>(ratio of<br>discharge/charge) | Reference                                                 |
|--------------------------------------------------------------------------|---------------------------------------------|---------------------------------------------------------|------------|-----------------------------------------------------------------------|-----------------------------------------------------------|
| Tir-OMC<br>(Mesoporous carbon, 2-<br>dimensional hexagonal<br>structure) | 2390<br>(6.7 nm pores)                      | 1048<br>(500 mAh $\text{g}^{-1}$<br>after 50<br>cycles) | 0.01 - 3   | 34                                                                    | H.-Q. Li et al.<br><i>Carbon</i> 45, 2628<br>(2007)       |
| CMK-3<br>(Mesoporous carbon, 2-<br>dimensional hexagonal<br>structure)   | 1147<br>(4 nm pores)                        | 1100 – 850<br>in 20 cycles                              | 0.01 - 3   | 34                                                                    | H. Zhou et al.<br><i>Adv. Mater.</i> , 15,<br>2107 (2003) |
| MSU-F-C<br>(Mesocellular carbon)                                         | 928<br>(4 & 28nm<br>pores)                  | 624<br>(99 %<br>retention after<br>50 cycles)           | 0 – 2.5    | 27.5                                                                  | This work                                                 |
| MSU-F-C-G<br>(Graphite functionalized<br>mesocellular carbon)            | 394<br>(28 nm pores)                        | 581<br>(93 &<br>retention after<br>50 cycles)           | 0 – 2.5    | 43.6                                                                  | This work                                                 |

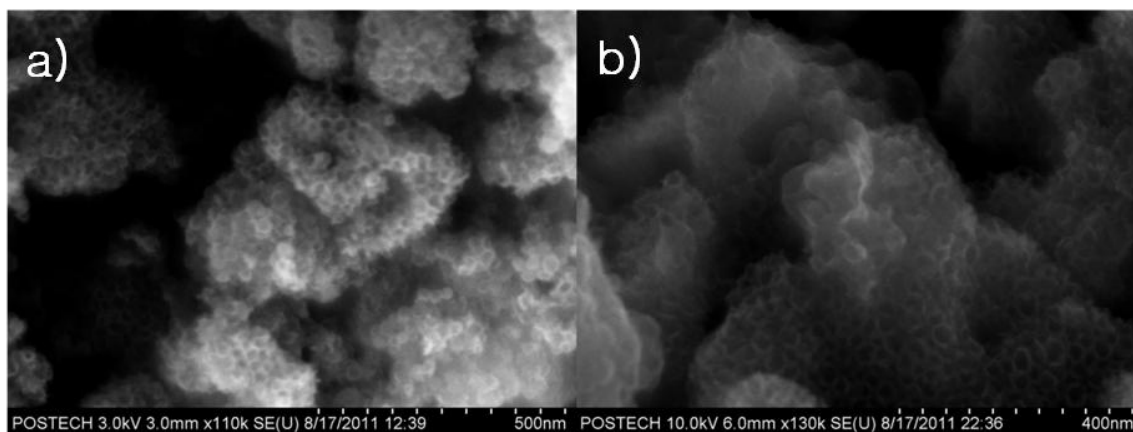

**Figure S1.** SEM images of (a) MSU-F-C and (b) MSU-F-C-G. The particle shape did not change after functionalization of the nanographite on MSU-F-C.

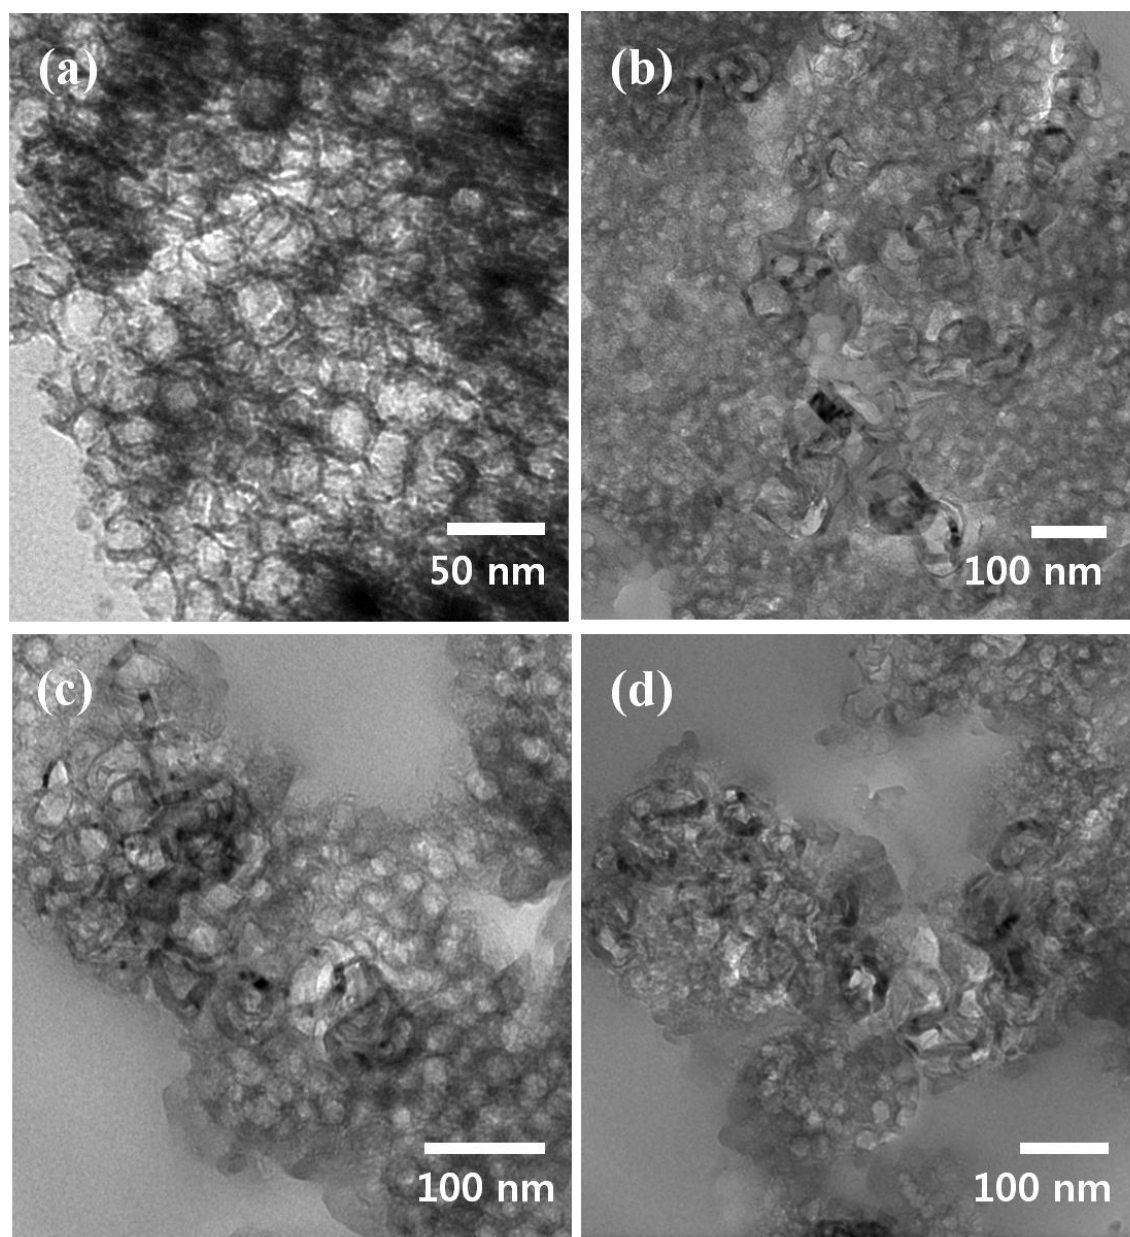

**Figure S2.** TEM images of (a) MSU-F-C and (b)-(d) MSU-F-C-G.

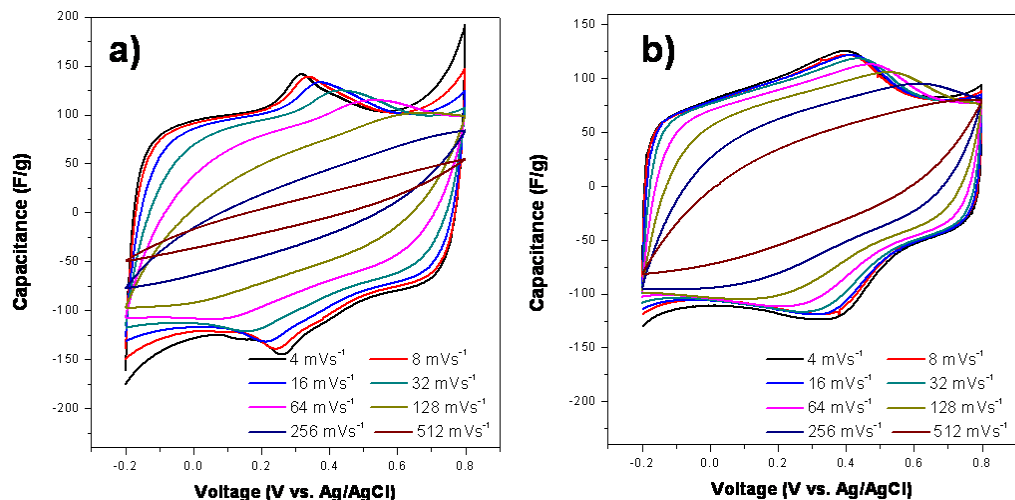

**Figure S3.** Capacitance-voltage profiles of (a) MSU-F-C and (b) MSU-F-C-G obtained from cyclic voltammograms. The large time constant( $\tau = ESR \times C$ ) of the MSU-F-C electrode distorts the rectangular shaped response of the current under high scan rate conditions. On the other hand, the enhanced electrical conductivity of the MSU-F-C-G material results in a better capacitance retention under high scan rate conditions.

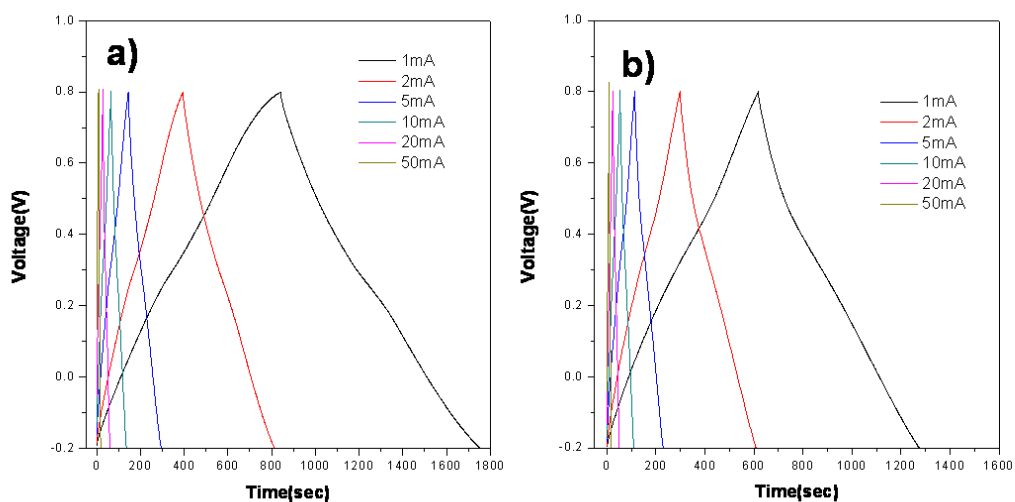

**Figure S4.** Galvanostatic charge/discharge graphs of (a) MSU-F-C, and (b) MSU-F-C-G within the potential range, -0.2 to 0.8V for various current rates (1 – 50 mA/cm<sup>2</sup>)

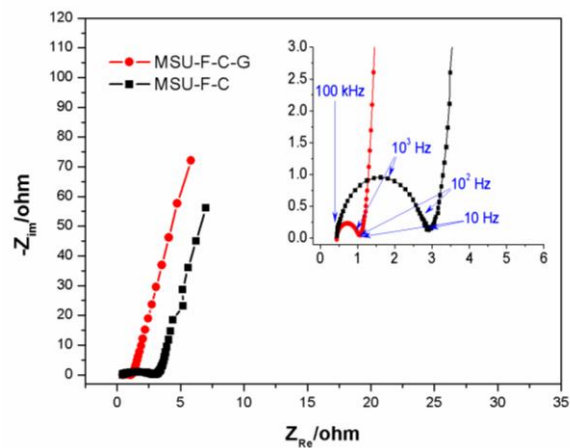

**Figure S5.** Nyquist plots of MSU-F-C and MSU-F-C-G at 0.2 V. (Inset : magnified view.)

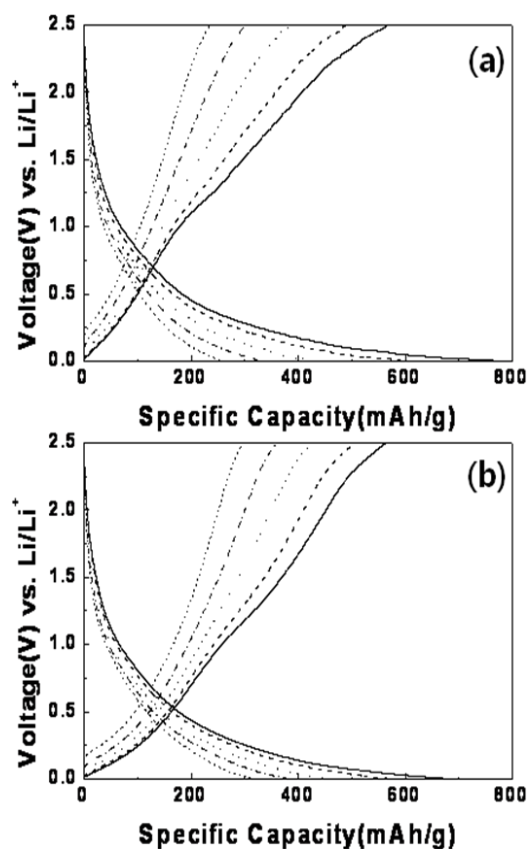

**Figure S6.** Change of the galvanostatic charge-discharge patterns of the (a) MSUF-F-C and (b) MSU-F-C-G anodes according to an applied current of 0.1 (solid), 0.2 (dashed), 0.5 (dotted), 1 (dash-dotted) and 2 C (short-dashed).

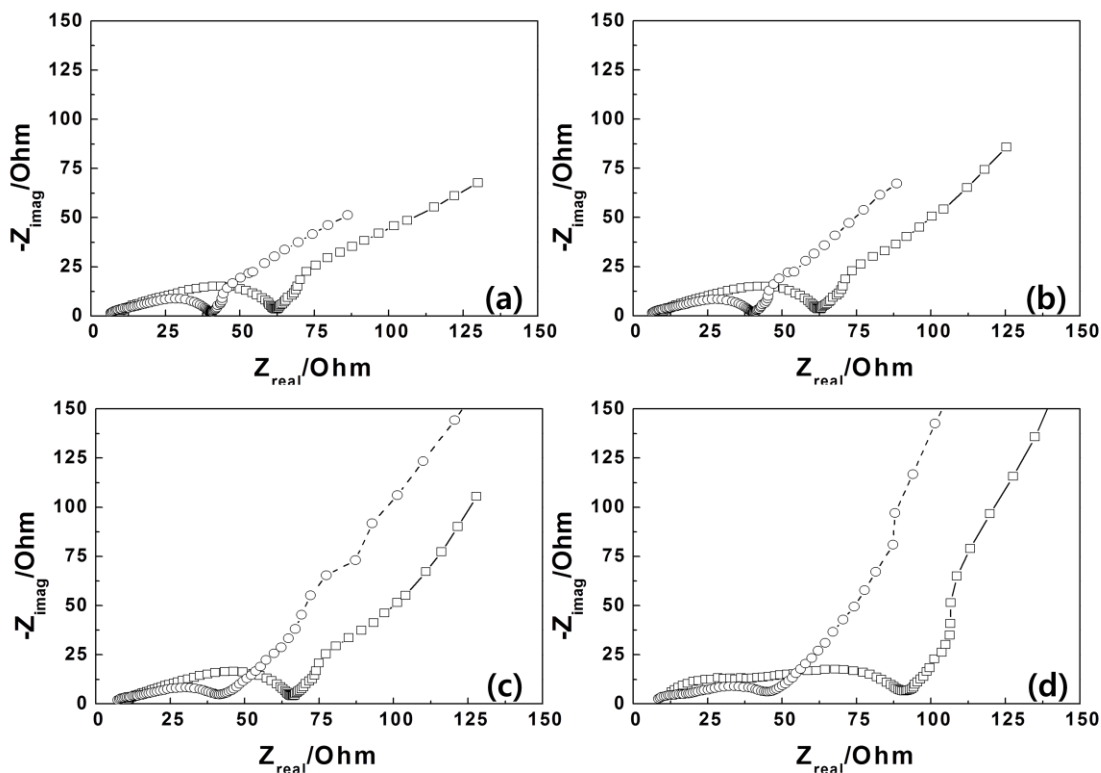

**Figure S7.** Electrochemical impedance spectra of the MSU-F-C (rectangles) and MSU-F-C-G (circles) anodes expressed as Nyquist plots according to measuring potentials of (a) 0, (b) 0.5, (c) 1.0 and (d) 2.0 V vs.  $\text{Li/Li}^+$ .
